# Supplementary material for: Mapping DNA interaction landscapes in psoriasis susceptibility loci highlights KLF4 as a target gene in 9q31
Source: PubMed Central journal article supplement (PMC7199343; doi:10.1186/s12915-020-00779-3), 2020-05-04

A

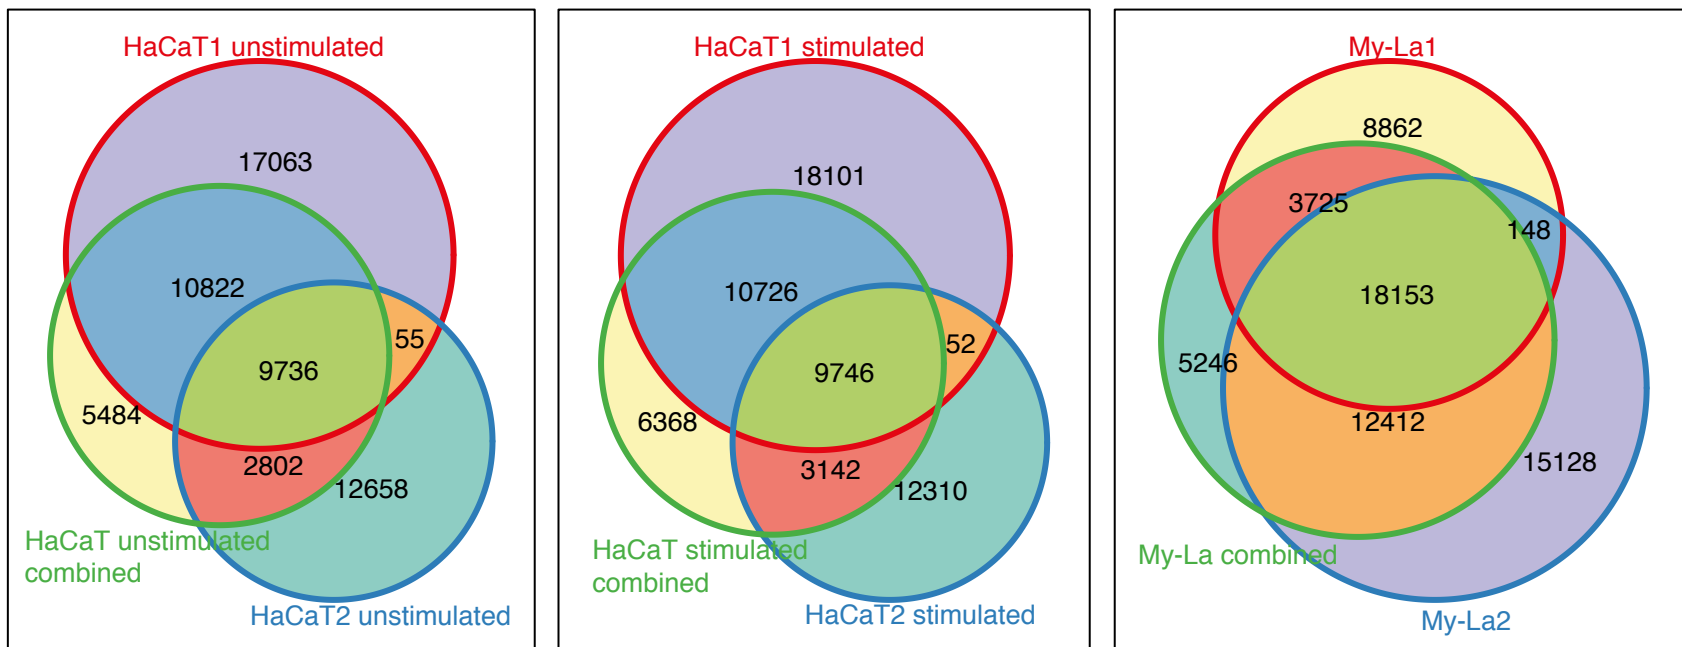

B

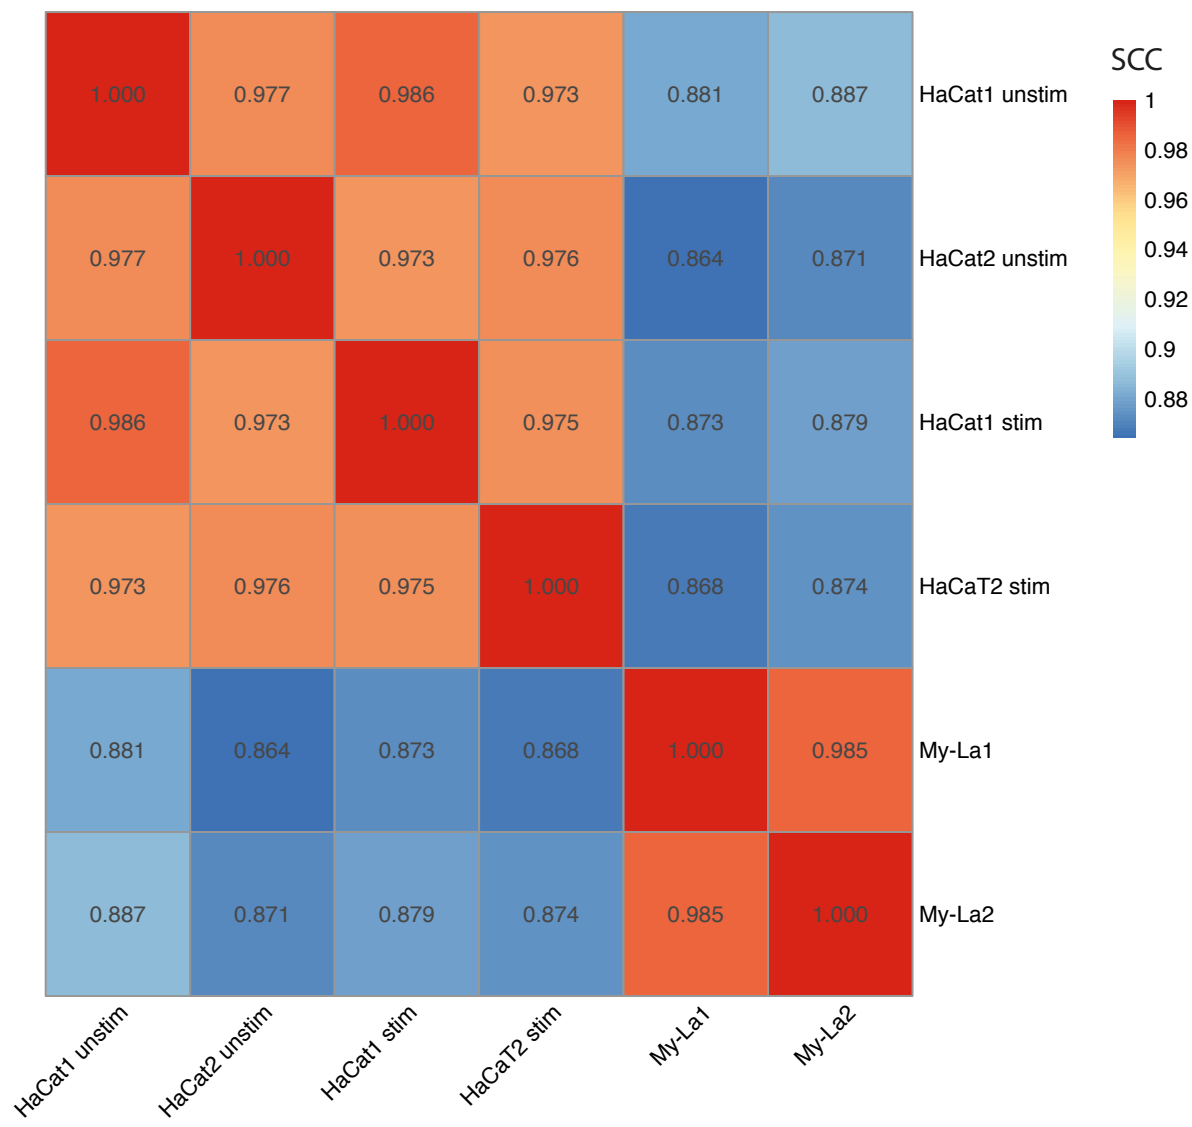

Supplement: 12915_2020_779_MOESM2_ESM.pdf [file 12915_2020_779_MOESM2_ESM.pdf]
