# Supplementary material for: Mapping DNA interaction landscapes in psoriasis susceptibility loci highlights KLF4 as a target gene in 9q31
Source: PubMed Central journal article supplement (PMC7199343; doi:10.1186/s12915-020-00779-3), 2020-05-04
Supplement: 12915_2020_779_MOESM10_ESM.pdf [file 12915_2020_779_MOESM10_ESM.pdf]

TADs  
DHSs  
Genes



fwd strand (+)  
rev strand (-)

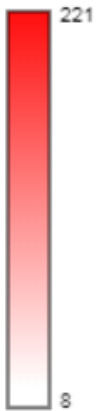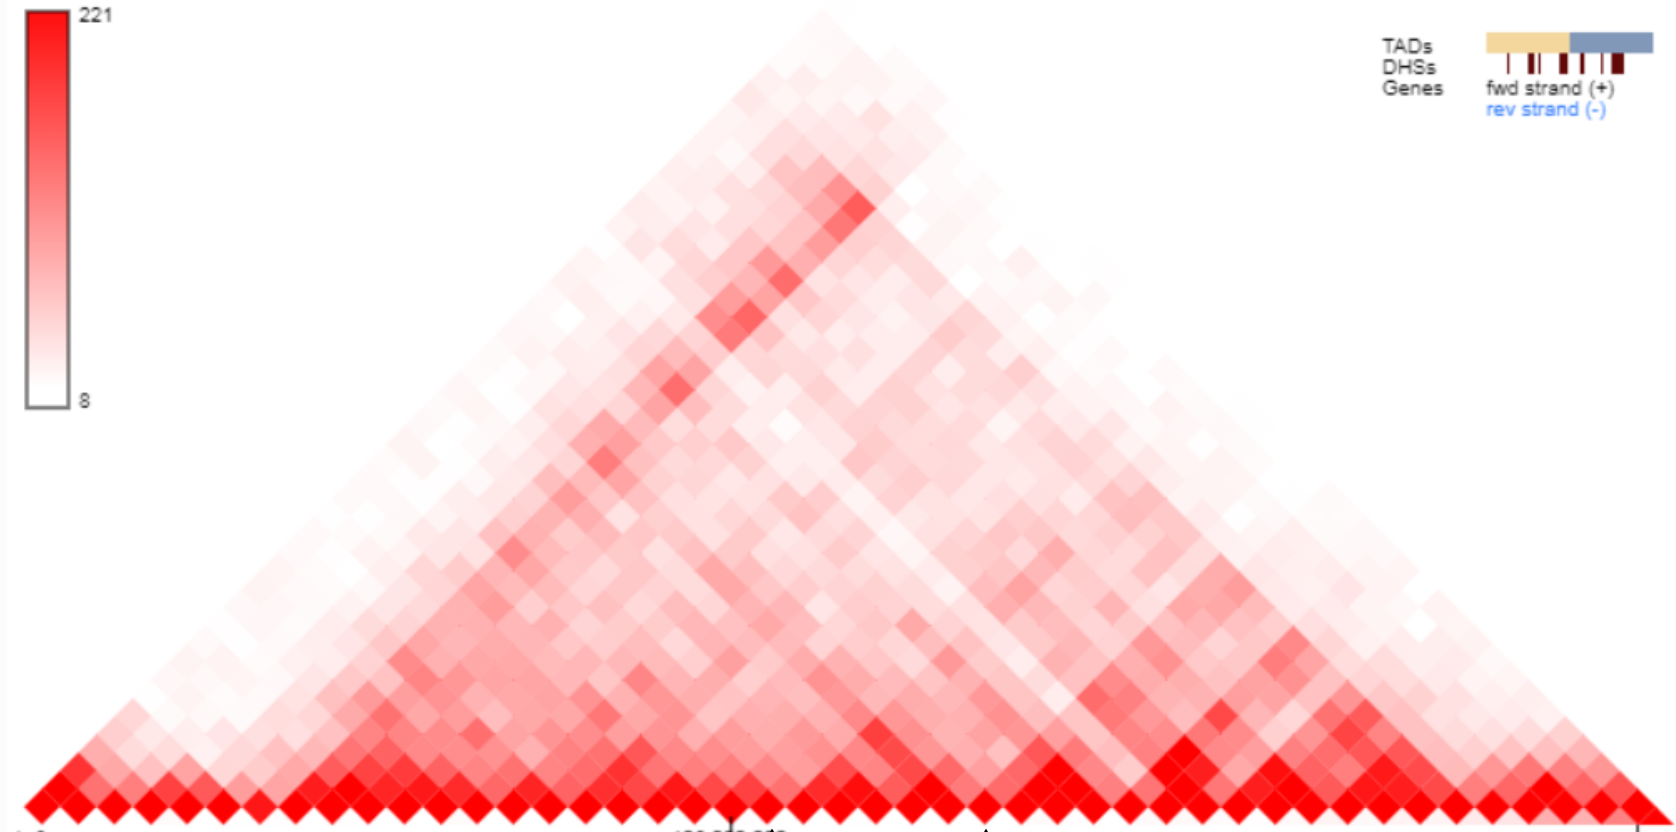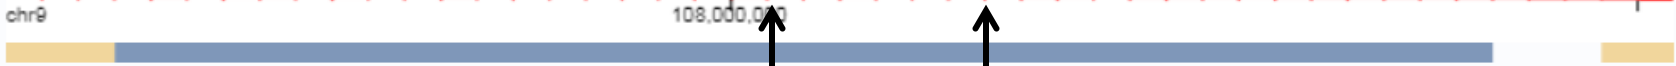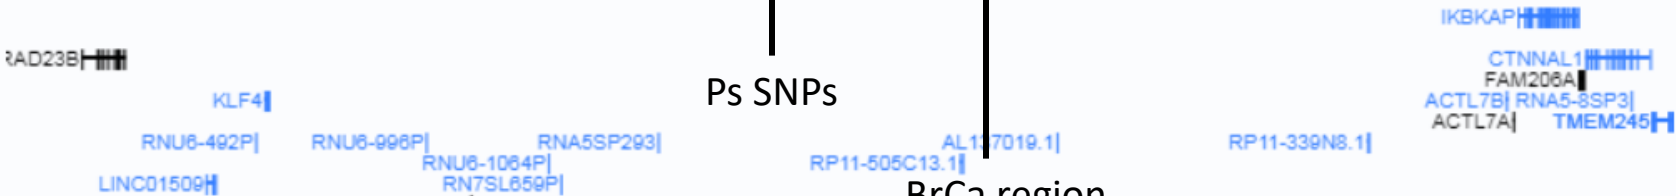

Ps SNPs

BrCa region

Dryden *et al.*, 2014
